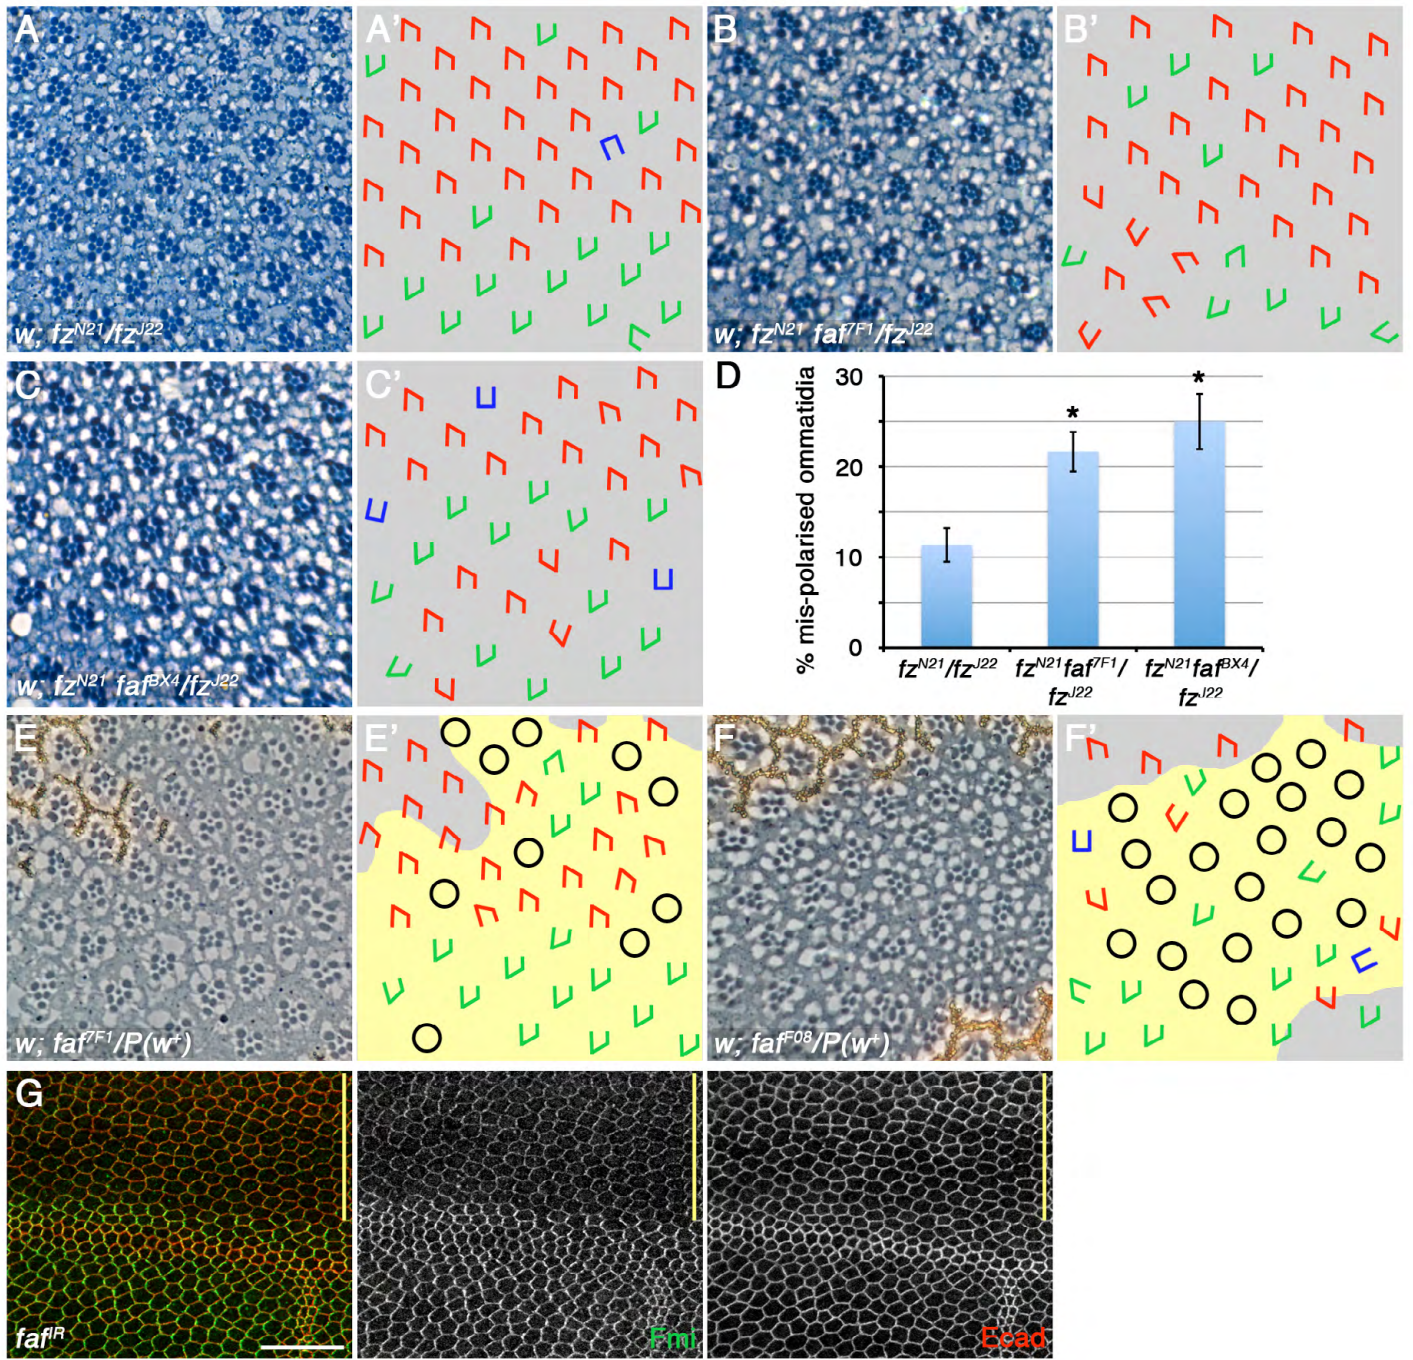

**Fig. S1. *faf* mutant phenotypes.** (A-C') Adult eye sections and cartoons of  $fz^{N21}/fz^{J22}$  (A),  $fz^{N21} faf^{F1}/fz^{J22}$  (B) and  $fz^{N21} faf^{BX4}/fz^{J22}$  (C). Red indicates dorsal ommatidia, green indicates ventral ommatidia and blue indicates achiral ommatidia. (D) The enhancement of the  $fz^{N21}/fz^{J22}$  ommatidial polarity phenotype by *faf*. Error bars are s.e.m.; \* $P < 0.05$ . (E-F')  $faf^{F1}$  (E) and  $faf^{F08}$  (F) eye clones, marked by loss of white pigment, or yellow in the cartoons. Note that in *faf* mutant tissue many ommatidia have photoreceptor recruitment defects (black circles in cartoons), but in ommatidia with normal photoreceptor number there are frequent polarity defects, including chirality defects and misrotations. (G) *ptc-GAL4/+; faf<sup>IR-2956</sup>/+* pupal wings stained for Fmi (green) or Ecad (red). Yellow bars mark the *ptc-GAL4* domain. Scale bar: 20  $\mu$ m.



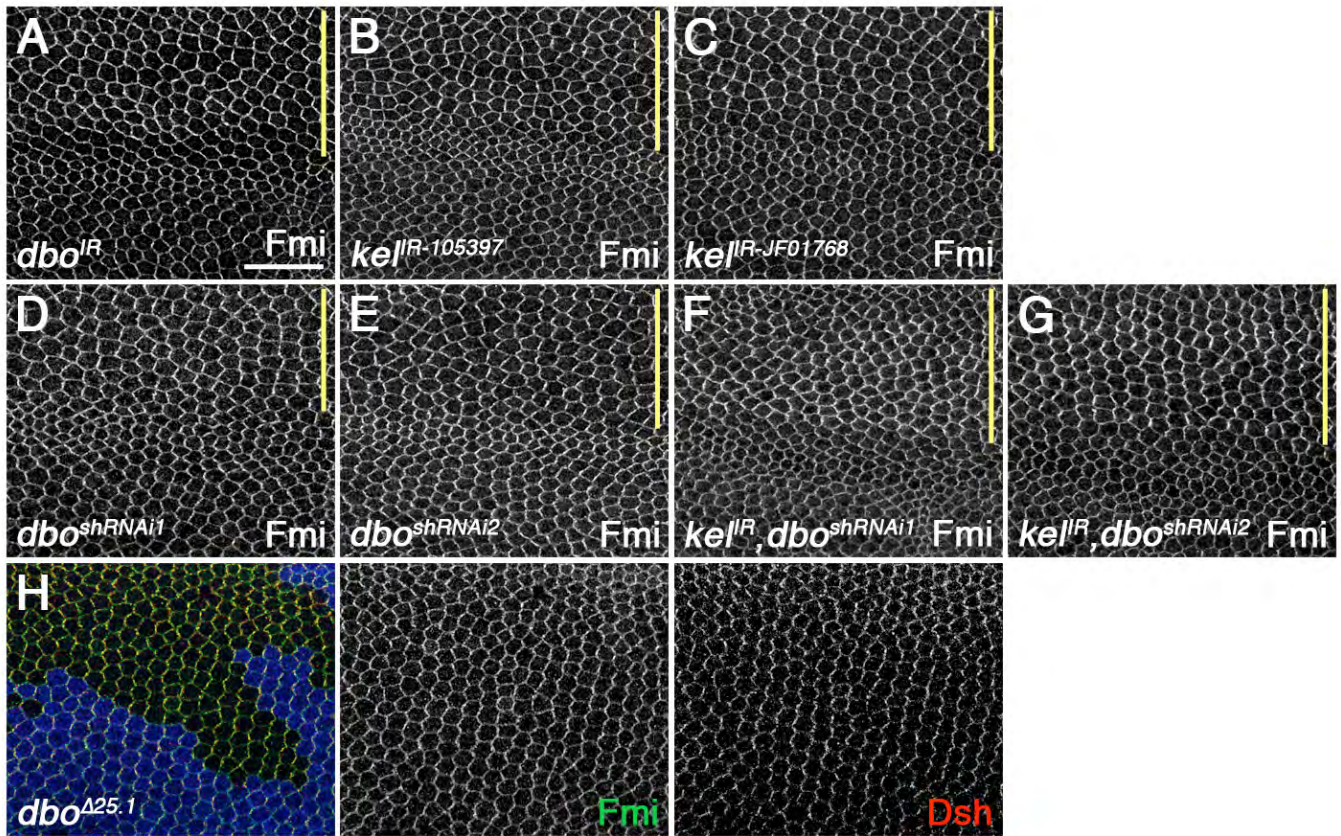

**Fig. S2. Effects of RNAi against *dbo* and *kel*.** (A-G) Pupal wings from *ptc-GAL4/dbo<sup>IR-105407</sup>; UAS-Dcr2/+* (A), *ptc-GAL4/kel<sup>IR-105397</sup>; UAS-Dcr2/+* (B), *ptc-GAL4/+; kel<sup>IR-JF01768</sup>/UAS-Dcr2* (C), *ptc-GAL4/dbo<sup>shRNAi1</sup>* (D), *ptc-GAL4/dbo<sup>shRNAi2</sup>* (E), *ptc-GAL4/dbo<sup>shRNAi1</sup>; kel<sup>IR-JF01768</sup>/UAS-Dcr2* (F) and *ptc-GAL4/dbo<sup>shRNAi2</sup>; kel<sup>IR-JF01768</sup>/UAS-Dcr2* (G) stained for Fmi. Note that the increase in core protein localisation caused by RNAi against *dbo* and *kel* (A-C) was not apparent in every wing, probably owing to variations in staining and the flatness of the wings. (H) *dbo<sup>Δ25.1</sup>* pupal wing clone stained for Fmi (green) and Dsh (red); clone marked by loss of β-gal (blue). Yellow bars mark the *ptc-GAL4* domain. Scale bar: 20 μm.

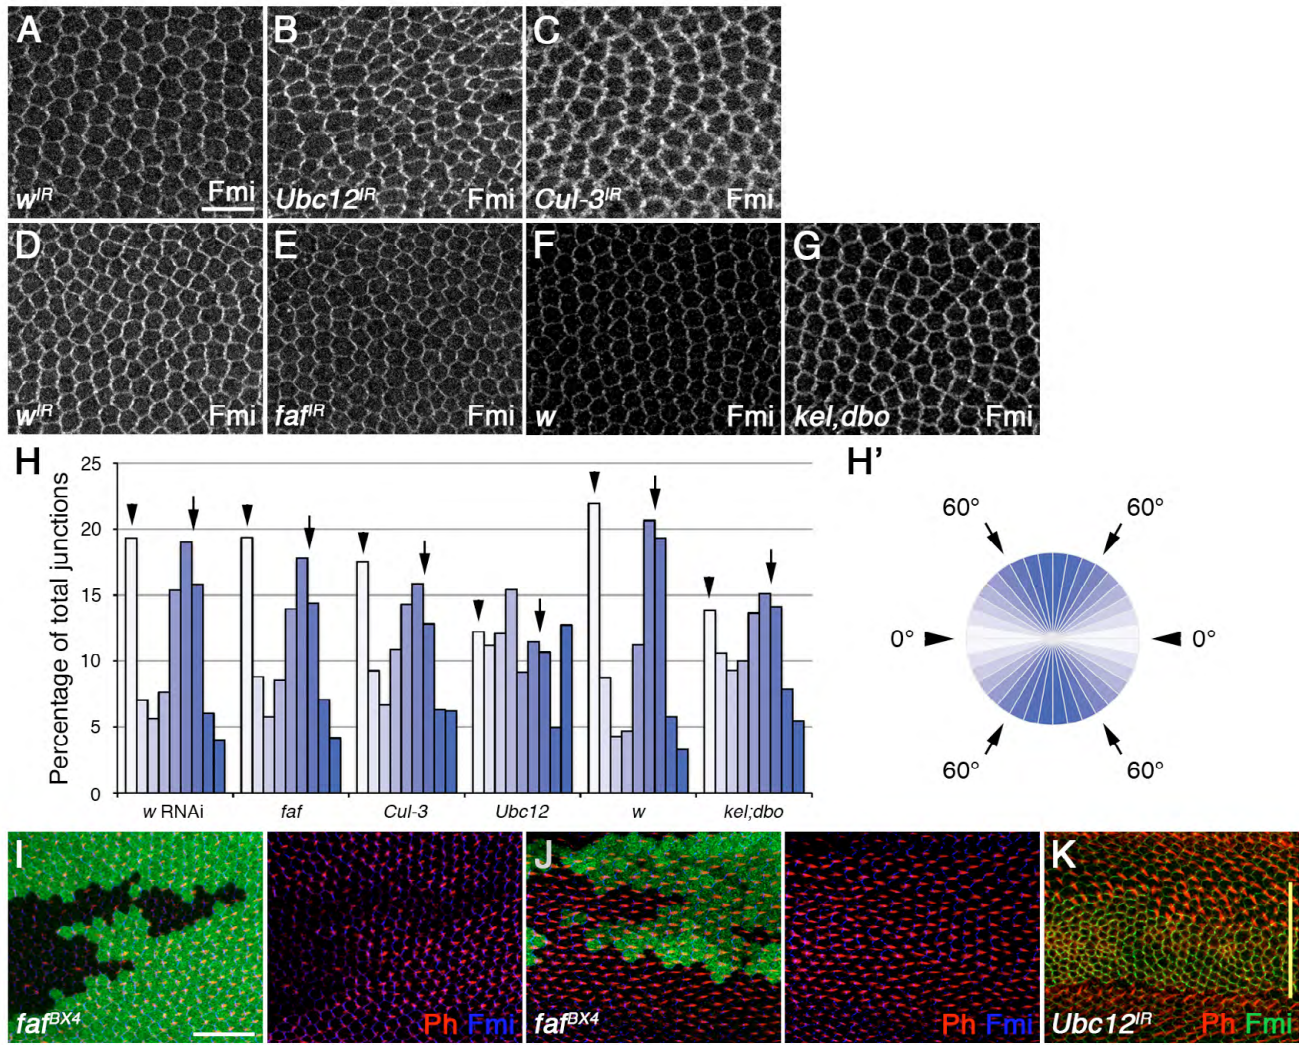

**Fig. S3. Loss of asymmetry and trichome phenotypes of *Ubc12*, *Cul-3* and *faf*.** (A-E) Male wings expressing *w<sup>IR-30033</sup>* (A,D), *Ubc12<sup>IR-7375R-3</sup>* (B), *Cul-3<sup>IR-109415</sup>* (C) and *faf<sup>IR-2956</sup>* (E) using *MS1096-GAL4*, stained with Fmi. (F,G) Pupal wings from *w<sup>1118</sup>* (F) or *kel<sup>DE1</sup>; dbo<sup>A25.1</sup>* double mutants (G), stained for Fmi. Sets of wings (A-C, D,E and F,G) were dissected, stained and imaged in parallel using the same confocal settings. All images are below vein 4. (H,H') The percentage of junctions oriented at different angles, where 0° is horizontal and 90° is vertical, in the above genotypes. Angles are binned into 10° categories, where 0-10° is white and 80-90° is dark blue. The colour scheme of the differently oriented junctions is shown in H'. For a hexagonal array of cells, most junctions would be expected to be oriented at around 0° (arrowheads) or 60° (arrows). Cell packing is very irregular in wings expressing *Ubc12* RNAi, which appears to have pleiotropic effects. By contrast, cell packing is only mildly affected in *Cul-3*, *dbo*; *kel* and *faf* wings, in line with the known role of core proteins in regulating junctional rearrangement. (I,J) *faf<sup>BX4</sup>* pupal wing clones stained for Fmi (blue) and with phalloidin (red); clones are marked by loss of  $\beta$ -gal (green), just after trichomes emerge in wild-type tissue (I) or when trichomes are slightly older (J). (K) *ptc-GAL4/+; Ubc12<sup>IR-7375R-3/+</sup>* pupal wings stained for Fmi (green) and with phalloidin (red). Note trichomes are very delayed where high levels of *Ubc12* RNAi are expressed, and trichomes swirl towards the compartment boundary. Yellow bars mark the *ptc-GAL4* domain. Scale bars: 10  $\mu$ m in A-G; 20  $\mu$ m in I-K.



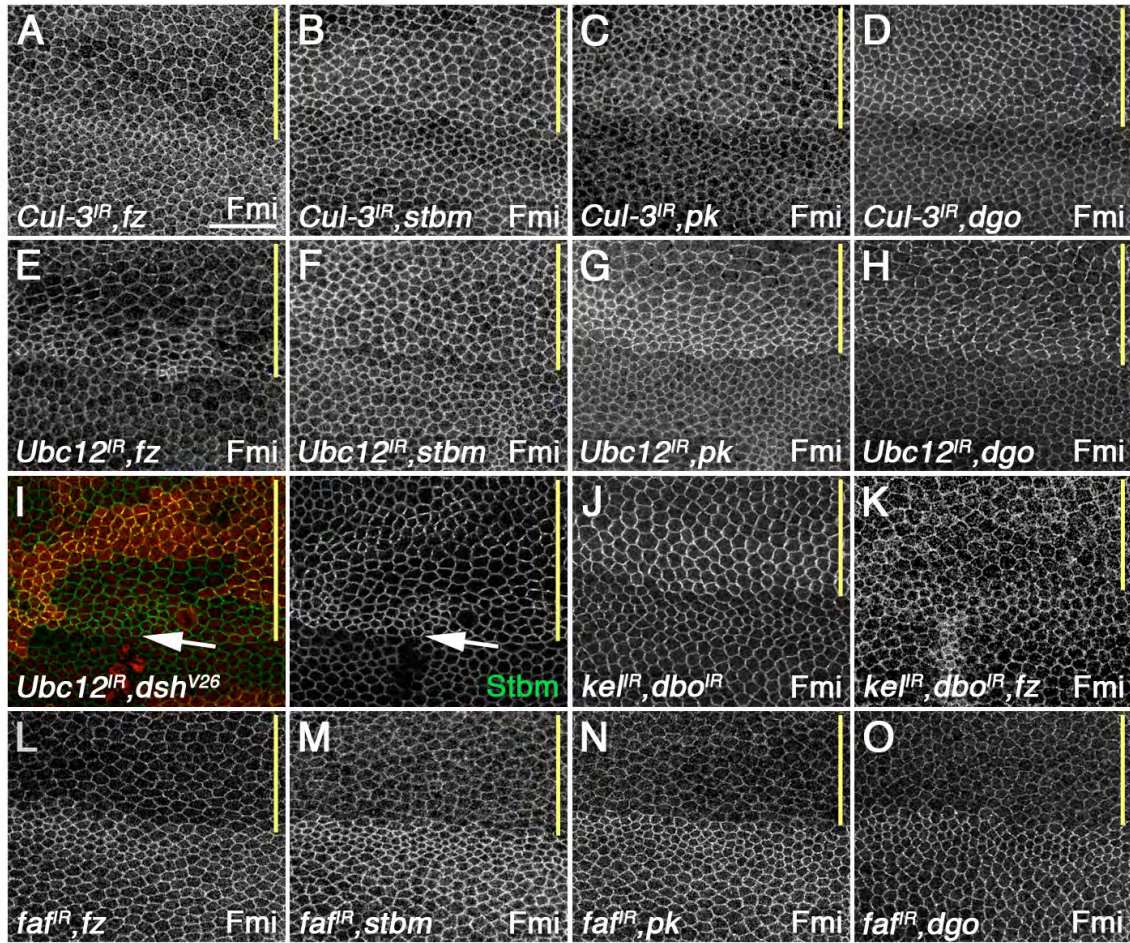

**Fig. S4. Identification of the targets of Dbo/Kel and Faf.** (A-O) *ptc-GAL4/Cul-3<sup>IR-109415</sup>; fz<sup>P21</sup>/fz<sup>P21</sup>* (A), *ptc-GAL4, stbm<sup>6</sup>/Cul-3<sup>IR-109415</sup>*, *stbm<sup>6</sup>* (B), *ptc-GAL4, pk<sup>pk-sple13</sup>/Cul-3<sup>IR-109415</sup>, pk<sup>pk-sple13</sup>* (C), *ptc-GAL4, dgo<sup>380</sup>/Cul-3<sup>IR-109415</sup>, dgo<sup>380</sup>* (D), *ptc-GAL4/+; Ubc12<sup>IR-7375R-3</sup>, fz<sup>P21</sup>/fz<sup>P21</sup>* (E), *ptc-GAL4, stbm<sup>6</sup>/stbm<sup>6</sup>; Ubc12<sup>IR-7375R-3</sup>/+* (F), *ptc-GAL4, pk<sup>pk-sple13</sup>/pk<sup>pk-sple13</sup>; Ubc12<sup>IR-7375R-3</sup>/+* (G), *ptc-GAL4, dgo<sup>380</sup>/dgo<sup>380</sup>; Ubc12<sup>IR-7375R-3</sup>/+* (H), *dsh<sup>V26</sup> FRT19A/FRT19A; ptc-GAL4/+; Ubc12<sup>IR-7375R-3</sup>, Ubx-FLP/+* (I), *ptc-GAL4/dbo<sup>IR-105407</sup>; kel<sup>IR-JF01768</sup>/+* (J), *ptc-GAL4/dbo<sup>IR-105407</sup>; kel<sup>IR-JF01768</sup>, fz<sup>P21</sup>/fz<sup>P21</sup>* (K), *ptc-GAL4/+; faf<sup>IR-2956</sup>, fz<sup>P21</sup>/fz<sup>P21</sup>* (L), *ptc-GAL4, stbm<sup>6</sup>/stbm<sup>6</sup>; faf<sup>IR-2956</sup>/+* (M), *ptc-GAL4, pk<sup>pk-sple13</sup>/pk<sup>pk-sple13</sup>; faf<sup>IR-2956</sup>/+* (N) and *ptc-GAL4, dgo<sup>380</sup>/dgo<sup>380</sup>; faf<sup>IR-2956</sup>/+* (O). Pupal wings are stained for Fmi, except for I which is stained for Stbm (green) and Dsh (red). Yellow bars mark the *ptc-GAL4* domain. Note that the *dsh* clone in I is very proximal in the wing and overlaps the AP compartment boundary, where *Ubc12* knockdown is strongest. *dsh* clones in more distal wing regions (where *Ubc12* knockdown is weaker) show complete suppression of the increase in core protein levels. In this proximal clone, *Ubc12* knockdown still induces a small increase in Stbm levels at junctions compared with wild-type tissue (below the arrow). Scale bar: 20  $\mu$ m.

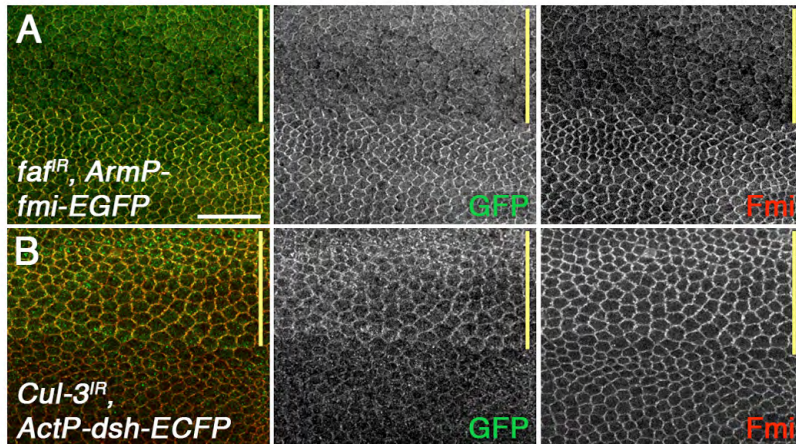

**Fig. S5. Alteration of core protein levels is post-transcriptional.** *ptc-GAL4/ArmP-Fmi-EGFP; faf<sup>IR-2956</sup>/+* (A) and *Ubx-FLP; ptc-GAL4/Cul3<sup>IR-109415</sup>; ActP-FRT-polyA-FRT-Dsh-ECFP/+* (B) pupal wings, stained for GFP (green) and Fmi (red). Yellow bars mark the *ptc-GAL4* domain. Scale bar: 20  $\mu$ m.



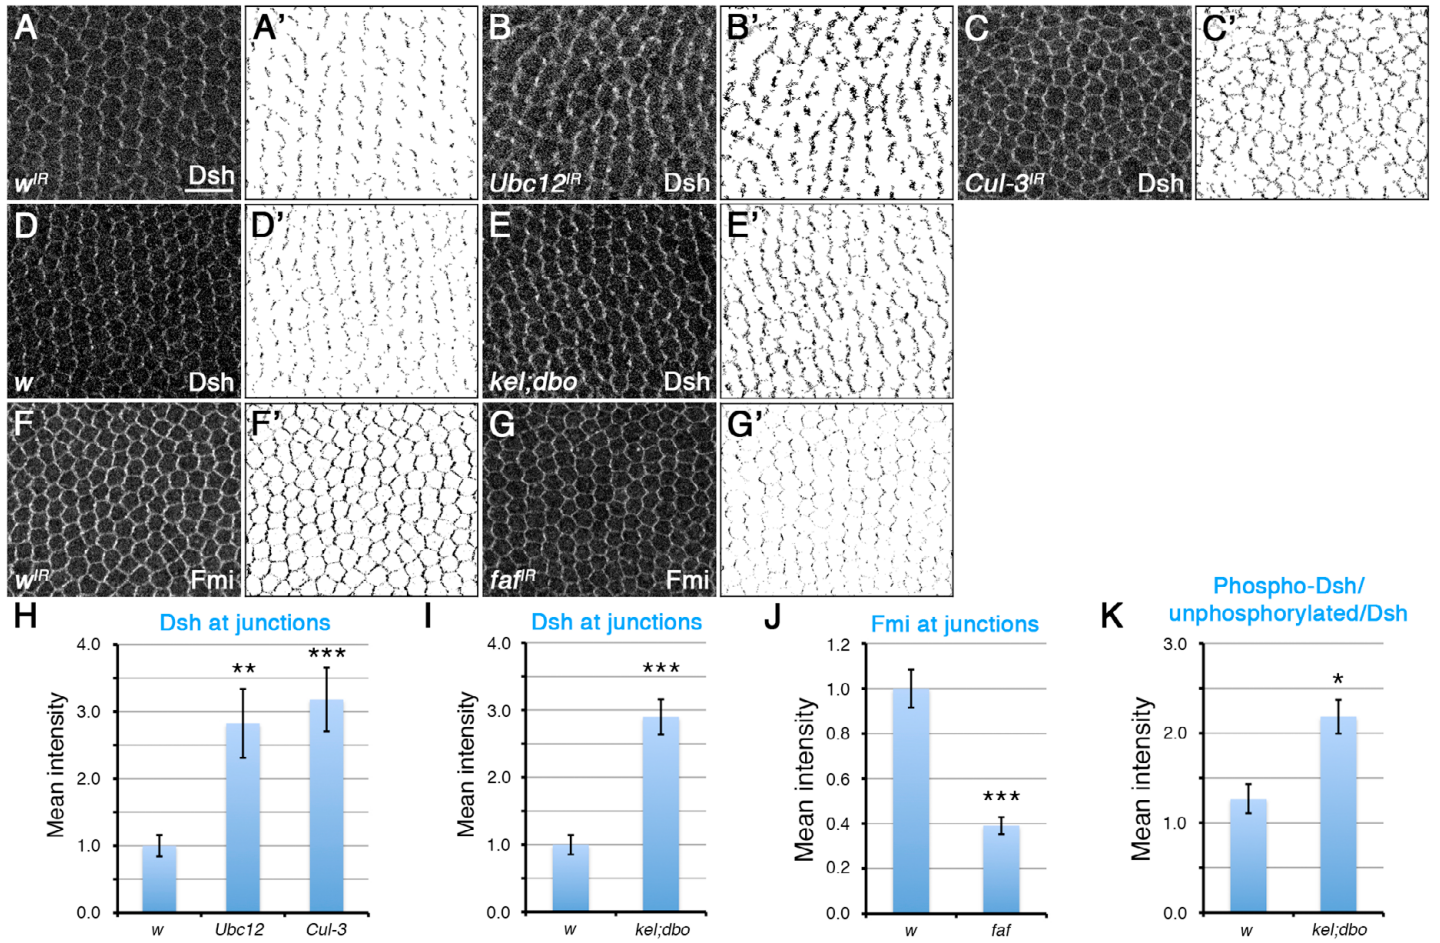

**Fig. S6. Analysis of junctional levels of Dsh and Fmi.** (A-C) Male pupal wings expressing  $w^{IR-30033}$  (A),  $Ubc12^{IR-7375R-3}$  (B) and  $Cul-3^{IR-109415}$  (C) using  $MS1096-GAL4$ , stained for Dsh. (D,E) Pupal wings from  $w^{1118}$  and  $kel^{DE1}; dbo^{\Delta 25.1}$  double mutants, stained for Dsh. (F,G) Male pupal wings expressing  $w^{IR-30033}$  (F) and  $faf^{IR-2956}$  (G) using  $MS1096-GAL4$ , stained for Fmi. Sets of wings (A-C, D,E and F,G) were dissected, stained and imaged in parallel using the same confocal settings. All images are below vein 4. Scale bar 10  $\mu$ m. (A'-G') Masks showing the area measured for intensity after thresholding the image (see Materials and methods). (H-J) Quantitation of junctional Dsh staining (H,I) or junctional Fmi staining (J) for the above genotypes. Error bars are s.e.m.; \*\*\* $P < 0.001$ , \*\* $P < 0.01$ . (K) Quantitation of phosphorylated Dsh relative to unphosphorylated Dsh from western blots of  $w^{1118}$  and  $kel^{DE1}; dbo^{\Delta 25.1}$  double mutants (see Fig. 5C). Quantitation is from western blots of three biological replicates. Error bars are s.e.m.; \* $P = 0.02$ .

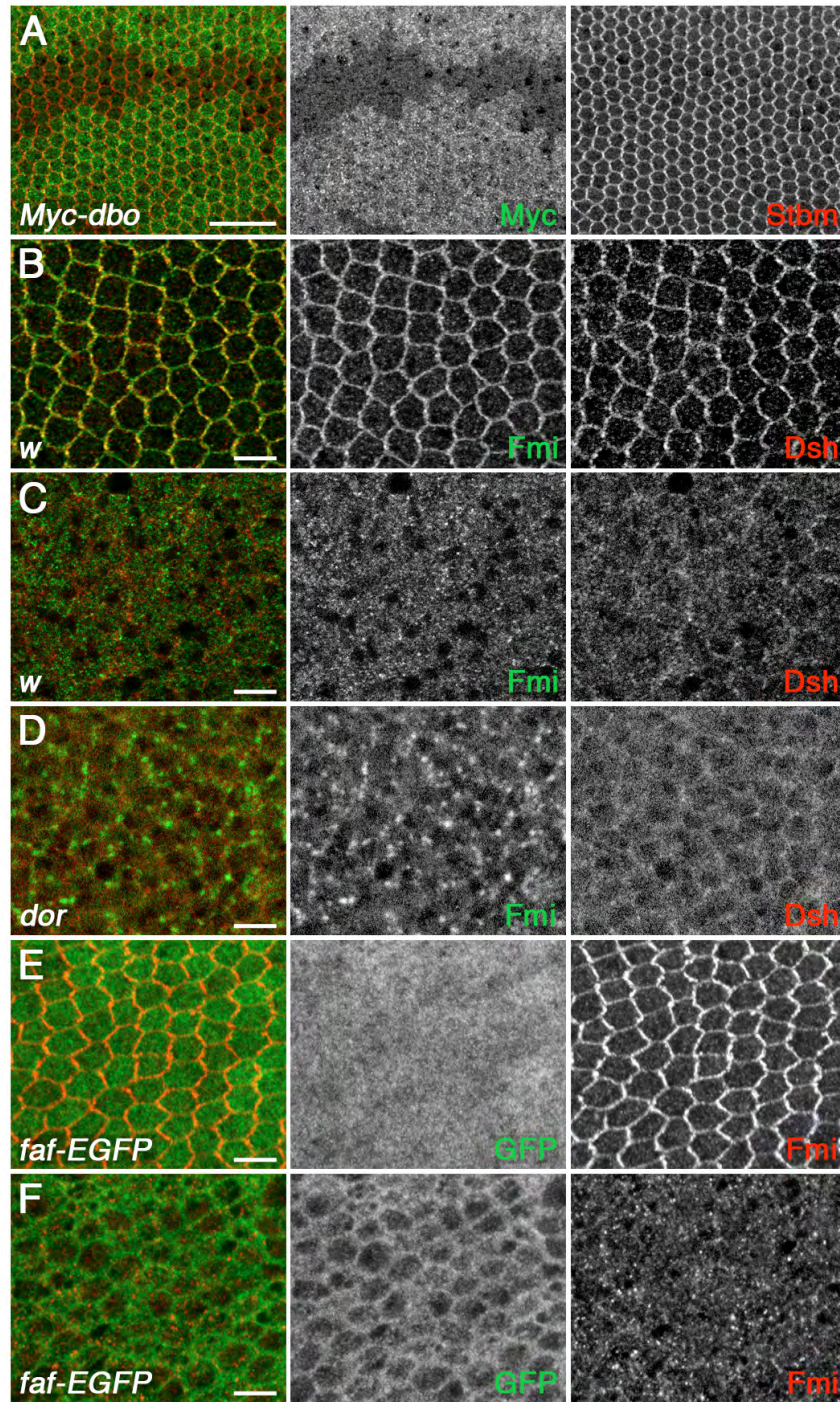

**Fig. S7. Localisation of Dbo and Faf in pupal wings.** (A) *Ubx-FLP; ActP-FRT-polyA-FRT-Myc-dbo/Δ2-3* pupal wings stained for Myc (green) and Stbm (red). (B,C) *w<sup>1118</sup>* pupal wings stained for Fmi (green) and Dsh (red), with apical (B) and subapical (C) sections. (D) *dor<sup>1R-33733</sup>/w; ptc-GAL4/+* pupal wings, stained for Fmi (green) and Dsh (red); subapical section (see Fig. 5L for junctional staining). Image is within the *ptc-GAL4* domain. (E,F) *Ubx-FLP; ActP-FRT-polyA-FRT-faf-EGFP/+* pupal wings stained for GFP (green) and Fmi (red), with apical (E) and subapical (F) staining. The *faf-EGFP* transgene rescues the *faf* mutant phenotype (not shown). Scale bars: 20  $\mu$ m in A; 5  $\mu$ m in B-F.



**Table S1. Adult and pupal wing screen of genes encoding predicted E2 ubiquitin-conjugating enzymes**

| CG number | Gene symbol   | RNAi line                                                         | <i>MS1096-GAL4</i><br>adult wing                                                                              | <i>ptc-GAL4</i><br>pupal wing                                              |
|-----------|---------------|-------------------------------------------------------------------|---------------------------------------------------------------------------------------------------------------|----------------------------------------------------------------------------|
| CG10254   | CG10254       | GD 15992<br>NIG 10254R-1<br>NIG 10254R-2<br>KK 108657             | wild type<br>wild type<br>wild type<br>wild type                                                              | wild type<br>wild type<br>wild type<br>-                                   |
| CG10536   | <i>crbx</i>   | GD 16078<br>KK 101755                                             | wild type<br>wild type                                                                                        | wild type<br>-                                                             |
| CG10640   | <i>Uev1A</i>  | GD 30890<br>GD 32267                                              | variable hair orientation <sup>#</sup><br>variable hair orientation <sup>#</sup>                              | cell packing defect*<br>cell packing defect*                               |
| CG10682   | <i>vih</i>    | GD 27306<br>KK 107720                                             | wild type<br>vein defect                                                                                      | wild type<br>-                                                             |
| CG10862   | CG10862       | GD 31372<br>GD 31373<br>KK 101113                                 | wild type<br>variable hair orientation<br>no polarity phenotype <sup>‡</sup>                                  | wild type<br>wild type<br>wild type with narrow intervein                  |
| CG12799   | <i>Ubc84D</i> | GD 20260<br>NIG 12799R-2<br>KK 106363                             | variable hair orientation<br>variable hair orientation<br>vein defect                                         | wild type<br>-<br>-                                                        |
| CG14739   | CG14739       | GD 18358<br>NIG 14739R-1<br>NIG 14739R-2<br>KK 105594             | wild type<br>wild type<br>wild type<br>wild type                                                              | wild type<br>-<br>-<br>-                                                   |
| CG15437   | CG15437       | GD 11090                                                          | wild type                                                                                                     | wild type                                                                  |
| CG16894   | CG16894       | GD 10067<br>GD 108983                                             | wild type<br>wild type                                                                                        | wild type<br>-                                                             |
| CG17030   | CG17030       | GD 32827<br>GD 32828<br>NIG 17030R-1<br>NIG 17031R-2<br>KK 108804 | variable hair orientation<br>variable hair orientation<br>variable hair orientation<br>wild type<br>wild type | wild type<br>-<br>-<br>-<br>-                                              |
| CG18319   | <i>ben</i>    | GD 9413                                                           | wings disrupted                                                                                               | cell packing defect*                                                       |
| CG2013    | CG2013        | GD 23229<br>GD 23230<br>GD 46927                                  | lethal<br>lethal<br>lethal                                                                                    | large, irregular cells<br>large, irregular cells<br>large, irregular cells |
| CG2257    | CG2257        | GD 33509<br>GD 33510                                              | wings disrupted<br>wings disrupted                                                                            | cell packing defect*<br>cell packing defect*                               |
| CG2574    | CG2574        | GD 40173<br>NIG 2574R-2<br>NIG 2574R-3<br>KK 105725               | wild type<br>wild type<br>wild type<br>wild type                                                              | wild type<br>-<br>-<br>-                                                   |
| CG2924    | CG2924        | NIG 2924R-3<br>KK 104482                                          | wild type<br>wild type                                                                                        | -<br>-                                                                     |
| CG3018    | <i>lwr</i>    | GD 33684<br>GD 33685                                              | lethal<br>lethal                                                                                              | cell packing defect*<br>cell packing defect*                               |

| CG number | Gene symbol  | RNAi line   | <i>MS1096-GAL4</i><br>adult wing             | <i>ptc-GAL4</i><br>pupal wing                       |
|-----------|--------------|-------------|----------------------------------------------|-----------------------------------------------------|
| CG3473    | CG3473       | GD 26201    | wild type                                    | wild type                                           |
|           |              | NIG 3473R-2 | wild type                                    | -                                                   |
|           |              | NIG 3473R-7 | wild type                                    | -                                                   |
|           |              | KK 104207   | no polarity phenotype <sup>‡</sup>           | lethal                                              |
| CG40045   | CG40045      | KK 109167   | vein defect                                  | -                                                   |
| CG4443    | <i>crl</i>   | GD 34109    | variable hair orientation                    | wild type                                           |
|           |              | GD 34111    | variable hair orientation                    | wild type                                           |
|           |              | NIG 4443R-1 | variable hair orientation                    | -                                                   |
|           |              | NIG 4443R-2 | variable hair orientation                    | -                                                   |
|           |              | KK 104440   | wild type                                    | -                                                   |
| CG4502    | CG4502       | GD 34855    | wings disrupted                              | cell packing defect*                                |
|           |              | GD 34858    | wild type                                    | wild type                                           |
| CG5440    | CG5440       | GD 49029    | wings disrupted                              | cell packing defect*                                |
|           |              | GD 49030    | -                                            | wild type                                           |
|           |              | NIG 5440R-3 | variable hair orientation                    | -                                                   |
| CG5788    | CG5788       | GD 27515    | wings disrupted                              | cell packing defect*                                |
|           |              | GD 48145    | vein defect                                  | cell packing defect*                                |
|           |              | GD 48146    | wings disrupted                              | cell packing defect*                                |
| CG5823    | CG5823       | GD 8301     | wild type                                    | wild type                                           |
|           |              | GD 33260    | wild type                                    | wild type                                           |
|           |              | NIG 5823R-1 | wild type                                    | -                                                   |
|           |              | NIG 5823R-3 | wild type                                    | -                                                   |
|           |              | KK 108292   | wild type                                    | -                                                   |
| CG6303    | <i>Bruce</i> | NIG 6303R-1 | wild type                                    | -                                                   |
|           |              | NIG 6303R-2 | wild type                                    | -                                                   |
|           |              | KK 107620   | ectopic bristles                             | -                                                   |
| CG6720    | <i>UbcD2</i> | GD 31158    | vein defect, possible swirls<br>below vein 4 | wild type                                           |
| CG7220    | CG7220       | GD 34198    | wild type                                    | wild type                                           |
|           |              | GD 34199    | wild type                                    | wild type                                           |
|           |              | KK 104478   | wild type                                    | -                                                   |
| CG7375    | <i>Ubc12</i> | GD 35219    | wings disrupted                              | accumulation of Fmi                                 |
|           |              | GD 35220    | wings disrupted                              | accumulation of Fmi                                 |
|           |              | NIG 7375R-2 | wild type                                    | wild type                                           |
|           |              | NIG 7375R-3 | wings disrupted                              | accumulation of Fmi                                 |
|           |              | KK 100761   | wings disrupted                              | accumulation of Fmi,<br>cell morphology<br>abnormal |
| CG7425    | <i>eff</i>   | GD 26011    | late larval lethal                           | lethal                                              |
|           |              | NIG 7425R-1 | wings disrupted                              | wild type                                           |
|           |              | NIG 7425R-2 | wings disrupted                              | wild type                                           |
| CG7656    | CG7656       | GD 26880    | wild type                                    | wild type                                           |
|           |              | GD 26881    | variable hair orientation                    | cell packing defect*                                |
|           |              | NIG 7656R-2 | wild type                                    | -                                                   |
| CG8188    | CG8188       | NIG 8188R-1 | wild type                                    | -                                                   |
|           |              | NIG 8188R-2 | wild type                                    | -                                                   |
|           |              | KK 103362   | wings curly                                  | wild type                                           |
| CG8284    | CG8284       | GD 35872    | wild type                                    | wild type                                           |
|           |              | GD 35873    | wild type                                    | wild type                                           |
|           |              | KK 106600   | ectopic bristles                             | -                                                   |



| <b>CG number</b> | <b>Gene symbol</b> | <b>RNAi line</b> | <b><i>MS1096-GAL4</i><br/>adult wing</b> | <b><i>ptc-GAL4</i><br/>pupal wing</b> |
|------------------|--------------------|------------------|------------------------------------------|---------------------------------------|
| CG9602           | CG9602             | GD 29498         | wild type                                | wild type                             |
|                  |                    | GD 29499         | vein defect                              | wild type                             |
|                  |                    | NIG 9602R-2      | wild type                                | -                                     |
|                  |                    | NIG 9602R-3      | wild type                                | -                                     |

GD, GD collection of RNAi lines from VDRC.

KK, KK collection of RNAi lines from VDRC.

NIG, RNAi lines from NIG-FLY.

Wings disrupted: hair polarity could not be assessed as wings could not be mounted flat.

Cell packing defect: cells not organised in the normal hexagonal array.

Irregular cells: cell size and packing disturbed.

#Using *ptc-GAL4*.

‡Male wings not mountable, hinge defect in female wings.

\*Fmi asymmetric in hexagonal cells.

**Table S2. Adult and pupal wing screen of genes encoding neddylation pathway components**

| CG number | Gene symbol              | RNAi line    | <i>MS1096-GAL4</i><br>adult wing | <i>ptc-GAL4</i><br>pupal wing                            |
|-----------|--------------------------|--------------|----------------------------------|----------------------------------------------------------|
| CG10679   | <i>Nedd8</i>             | GD 28444     | lethal                           | lethal                                                   |
|           |                          | GD 28445     | lethal                           | lethal                                                   |
| CG13343   | <i>Uba3</i>              | GD 17137     | wild type                        | wild type                                                |
|           |                          | GD 17139     | wild type                        | accumulation of Fmi                                      |
|           |                          | NIG 13343R-4 | wings disrupted                  | accumulation of Fmi                                      |
| CG7828    | <i>APP-BP1</i>           | GD 7728      | wild type                        | -                                                        |
|           |                          | NIG 7828R-2  | wings slightly curly             | -                                                        |
|           |                          | NIG 7828R-3  | wild type                        | -                                                        |
| CG16982   | <i>Roc1a<sup>†</sup></i> | GD 32399     | lethal                           | accumulation of Fmi                                      |
| CG16988   | <i>Roc1b<sup>†</sup></i> | GD 32797     | lethal                           | Cell packing defect,<br>Fmi levels increase<br>slightly? |

GD, GD collection of RNAi lines from VDRC.

NIG, RNAi lines from NIG-FLY.

Wings disrupted: hair polarity could not be assessed as wings could not be mounted flat.

Cell packing defect: cells not organised in the normal hexagonal array.

<sup>†</sup>Roc proteins are not specific to the neddylation pathway, as they are also subunits of Cullin E3 ligase complexes.

**Table S3. Adult and pupal wing screen of genes encoding Cullins**

| CG number | Gene symbol        | RNAi line    | <i>MS1096-GAL4</i><br>adult wing | <i>ptc-GAL4</i><br>pupal wing |
|-----------|--------------------|--------------|----------------------------------|-------------------------------|
| CG1877    | <i>lin19/Cul-1</i> | GD 33406     | lethal                           | wild type                     |
|           |                    | GD 33407     | wild type                        | embryonic lethal 29°C         |
|           |                    | GD 42445     | lethal                           | pupal lethal 18°C             |
| CG1512    | <i>Cul-2</i>       | GD 19297     | wings disrupted                  | cell packing defect*          |
|           |                    | GD 19298     | wings disrupted                  | wild type                     |
| CG42616   | <i>Cul-3</i>       | GD 16331     | wings disrupted                  | accumulation of Fmi           |
|           |                    | NIG 11861R-1 | wings disrupted                  | accumulation of Fmi           |
|           |                    | NIG 11861R-2 | wings disrupted                  | accumulation of Fmi           |
|           |                    | KK 109415    | wings disrupted                  | accumulation of Fmi           |
| CG8711    | <i>Cul-4</i>       | NIG 8711R-1  | wings disrupted                  | wild type                     |
| CG1401    | <i>Cul-5</i>       | GD 52175     | wild type                        | wild type                     |
|           |                    | GD 52176     | wild type                        | wild type                     |
|           |                    | KK 108817    | lethal                           | wild type                     |

GD, GD collection of RNAi lines from VDRC.

KK, KK collection of RNAi lines from VDRC.

NIG, RNAi lines from NIG-FLY.

Wings disrupted: hair polarity could not be assessed as wings could not be mounted flat.

Cell packing defect: cells not organised in the normal hexagonal array.

\*Fmi asymmetric in hexagonal cells.



**Table S4. Adult and pupal wing screen of genes encoding BTB domain proteins**

| <b>CG number</b> | <b>Gene symbol</b> | <b>RNAi line</b> | <b><i>MS1096-GAL4</i><br/>adult wing</b>                            | <b><i>ptc-GAL4</i><br/>pupal wing</b> |
|------------------|--------------------|------------------|---------------------------------------------------------------------|---------------------------------------|
| CG10465          | CG10465            | KK 107131        | variable hair orientation                                           | wild type                             |
| CG10752          | CG10752            | GD 30007         | wild type                                                           | -                                     |
|                  |                    | NIG 10752R-1     | wild type                                                           | -                                     |
|                  |                    | NIG 10752R-3     | wild type                                                           | -                                     |
|                  |                    | KK 106721        | wings disrupted                                                     | wild type                             |
| CG10801          | CG10801            | GD 45748         | wild type                                                           | -                                     |
|                  |                    | GD 45749         | wild type                                                           | -                                     |
|                  |                    | KK 100397        | wings slightly disrupted,<br>possible swirl                         | wild type                             |
| CG11275          | CG11275            | NIG 11275R-1     | wild type                                                           | -                                     |
|                  |                    | NIG 11275R-2     | wild type                                                           | -                                     |
| CG11491          | <i>br</i>          | GD 13705         | lethal                                                              | disrupted                             |
|                  |                    | GD 38526         | wings disrupted                                                     | wild type                             |
|                  |                    | NIG 11514R-1     | wild type                                                           | -                                     |
| CG11714          | CG11714            | GD 31116         | wild type                                                           | -                                     |
|                  |                    | GD 31117         | wild type                                                           | -                                     |
|                  |                    | GD 50558         | wild type                                                           | -                                     |
|                  |                    | GD 50559         | wild type                                                           | -                                     |
| CG12052          | <i>lola</i>        | GD 12573         | wild type                                                           | -                                     |
|                  |                    | GD 20634         | wild type                                                           | wild type                             |
|                  |                    | GD 21057         | wild type                                                           | -                                     |
|                  |                    | GD 25333         | wings disrupted                                                     | wild type                             |
|                  |                    | GD 41415         | lethal                                                              | large cells                           |
| CG12236          | CG12236            | NIG 12236R-1     | disrupted                                                           | large cells                           |
| CG12423          | <i>klhl10</i>      | GD 35721         | wild type                                                           | -                                     |
|                  |                    | GD 35722         | wild type                                                           | -                                     |
|                  |                    | KK 109083        | wings disrupted                                                     | wild type                             |
| CG12537          | <i>rdx</i>         | GD 28798         | wings disrupted                                                     | wild type                             |
|                  |                    | GD 28800         | wings disrupted                                                     | wild type                             |
|                  |                    | GD 45759         | wild type                                                           | -                                     |
|                  |                    | GD 45761         | wings disrupted                                                     | wild type                             |
| CG12692          | CG12692            | GD 17292         | wild type                                                           | -                                     |
|                  |                    | KK 109683        | wild type                                                           | -                                     |
| CG12857          | CG12857            | GD 45029         | wild type                                                           | -                                     |
|                  |                    | GD 45030         | wild type                                                           | -                                     |
|                  |                    | NIG 12857R-2     | wild type                                                           | -                                     |
|                  |                    | NIG 12857R-3     | wild type                                                           | -                                     |
|                  |                    | KK 101639        | wild type                                                           | -                                     |
| CG13917          | CG13917            | GD 32082         | wings disrupted                                                     | cell packing defect                   |
| CG14260          | CG14260            | GD 50132         | wild type                                                           | -                                     |
|                  |                    | NIG 14260R-4     | wild type                                                           | -                                     |
| CG14262          | CG14262            | GD 24855         | wild type                                                           | -                                     |
|                  |                    | GD 24856         | wild type                                                           | -                                     |
| CG14307          | <i>fru</i>         | KK 105005        | wings slightly disrupted,<br>possible swirl, multiple<br>wing hairs | wild type                             |
| CG14785          | CG14785            | GD 43594         | wings disrupted                                                     | wild type                             |

| CG number | Gene symbol       | RNAi line    | <i>MS1096-GAL4</i><br>adult wing            | <i>ptc-GAL4</i><br>pupal wing |
|-----------|-------------------|--------------|---------------------------------------------|-------------------------------|
| CG15097   | CG15097           | KK 109428    | wings slightly disrupted,<br>possible swirl | slightly large cells          |
| CG15725   | CG15725           | GD 38868     | wild type                                   | -                             |
|           |                   | KK 103687    | wild type                                   | -                             |
|           |                   | KK 106953    | wild type                                   | -                             |
| CG15812   | <i>pfk</i>        | GD 13361     | wings disrupted                             | wild type                     |
|           |                   | GD 14020     | wings disrupted                             | wild type                     |
| CG16778   | CG16778           | GD 10739     | wild type                                   | -                             |
| CG16952   | CG16952           | GD 10149     | wild type                                   | -                             |
|           |                   | GD 19166     | wild type                                   | -                             |
| CG17068   | CG17068           | GD 32849     | wild type                                   | -                             |
|           |                   | GD 32850     | wild type                                   | -                             |
|           |                   | NIG 17068R-1 | wild type                                   | -                             |
|           |                   | NIG 17068R-4 | wild type                                   | -                             |
| CG17754   | CG17754           | GD 47274     | weak multiple wing hairs                    | wild type                     |
|           |                   | GD 47275     | wild type                                   | -                             |
|           |                   | GD 47276     | wild type                                   | -                             |
|           |                   | GD 47277     | wild type                                   | -                             |
|           |                   | KK 104337    | wings disrupted                             | wild type                     |
| CG1812    | CG1812            | GD 15491     | wild type                                   | -                             |
| CG1826    | CG1826            | GD 33049     | wild type                                   | -                             |
| CG18471   | <i>gprs</i>       | GD 41673     | wild type                                   | -                             |
| CG1856    | <i>ttk</i>        | KK 10855     | wild type                                   | -                             |
| CG2368    | <i>psq</i>        | GD 30591     | wild type                                   | -                             |
|           |                   | KK 106404    | wings disrupted                             | lethal                        |
| CG30357   | CG30357           | GD 21144     | wild type                                   | -                             |
|           |                   | KK 108708    | wild type                                   | -                             |
| CG31666   | <i>chinmo</i>     | NIG 17156R-1 | vein defects                                | wild type                     |
|           |                   | NIG 17156R-2 | variable hair orientation                   | -                             |
| CG32121   | CG32121           | GD 34404     | wild type                                   | -                             |
|           |                   | GD 34405     | wings disrupted                             | cell packing defect           |
| CG32491   | <i>mod (mdg4)</i> | GD 52268     | lethal                                      | cell packing defect           |
|           |                   | NIG 15802R-1 | lethal                                      | cell packing defect           |
|           |                   | NIG 15802R-3 | wild type                                   | -                             |
|           |                   | NIG 32491R-1 | wings disrupted                             | wild type                     |
| CG33261   | <i>Trl</i>        | GD 41095     | wings disrupted                             | cell packing defect*          |
|           |                   | NIG 9343R-1  | hair morphology defect                      | wild type                     |
|           |                   | NIG 9343R-2  | wings curly                                 | slightly large cells          |
|           |                   | KK 106433    | wings disrupted                             | cell packing defect*          |
| CG33291   | CG33291           | GD 35501     | wild type                                   | -                             |
|           |                   | GD 35503     | wild type                                   | -                             |
|           |                   | KK 107170    | ectopic bristles                            | -                             |



| CG number | Gene symbol   | RNAi line    | <i>MS1096-GAL4</i><br>adult wing | <i>ptc-GAL4</i><br>pupal wing |
|-----------|---------------|--------------|----------------------------------|-------------------------------|
| CG34346   | <i>mamo</i>   | GD 29874     | wild type                        | wild type                     |
|           |               | GD 29875     | wild type                        | wild type                     |
|           |               | GD 38223     | wings disrupted                  | wild type                     |
|           |               | GD 45349     | wings disrupted                  | cell packing defect           |
|           |               | GD 48679     | wild type                        | -                             |
|           |               | GD 48680     | wild type                        | -                             |
|           |               | NIG 11082R-2 | wild type                        | -                             |
|           |               | NIG 11082R-3 | wild type                        | -                             |
| CG34376   | CG34376       | GD 24804     | wild type                        | -                             |
|           |               | GD 24805     | wings disrupted                  | wild type                     |
|           |               | GD 25038     | wild type                        | -                             |
|           |               | NIG 31160R-1 | wild type                        | -                             |
|           |               | NIG 31160R-3 | wings disrupted                  | wild type                     |
|           |               | KK 102795    | wings disrupted                  | wild type                     |
| CG3571    | <i>KLHL18</i> | GD 12052     | wild type                        | -                             |
|           |               | GD 43777     | wild type                        | -                             |
|           |               | GD 43778     | wild type                        | -                             |
| CG3711    | CG3711        | GD 11164     | wild type                        | -                             |
|           |               | GD 11166     | wild type                        | -                             |
|           |               | NIG 3711R-2  | wild type                        | -                             |
|           |               | NIG 3711R-3  | wild type                        | -                             |
| CG3726    | CG3726        | GD 41090     | wild type                        | -                             |
|           |               | GD 41091     | wild type                        | -                             |
| CG3962    | <i>Keap1</i>  | KK 107052    | wings curly                      | wild type                     |
| CG4069    | CG4069        | GD 21783     | wings disrupted                  | wild type                     |
| CG41099   | CG41099       | GD 32927     | wild type                        | -                             |
|           |               | GD 32928     | wild type                        | -                             |
|           |               | GD 40076     | wild type                        | -                             |
| CG43226   | <i>lute</i>   | GD 34986     | wild type                        | -                             |
|           |               | GD 34987     | wild type                        | -                             |
|           |               | NIG 5319R-3  | wild type                        | wild type                     |
|           |               | NIG 5319R-4  | wild type                        | -                             |
|           |               | KK 108082    | disrupted                        | slightly large cells          |
| CG43365   | <i>BtbVII</i> | KK 106063    | wings disrupted                  | cell packing defect           |
| CG4807    | <i>ab</i>     | GD 41005     | lethal                           | cell packing defect           |
| CG5186    | <i>slim</i>   | GD 15185     | wild type                        | -                             |
|           |               | NIG 5186R-1  | wild type                        | -                             |
|           |               | NIG 5186R-2  | wings disrupted                  | lethal                        |
| CG5575    | <i>ken</i>    | GD 48596     | lethal                           | disrupted                     |
| CG5701    | <i>RhoBTB</i> | KK 100815    | wings disrupted                  | wild type                     |
| CG5738    | <i>lolal</i>  | GD 9571      | lethal                           | lethal                        |
|           |               | GD 9572      | lethal                           | cell packing defect           |
|           |               | GD 9573      | wings disrupted                  | cell packing defect           |
| CG6118    | CG6118        | GD 38061     | lethal                           | wild type                     |
|           |               | GD 38062     | lethal                           | wild type                     |

| CG number | Gene symbol     | RNAi line                                                      | <i>MS1096-GAL4</i><br>adult wing                                                       | <i>ptc-GAL4</i><br>pupal wing                                                                                          |
|-----------|-----------------|----------------------------------------------------------------|----------------------------------------------------------------------------------------|------------------------------------------------------------------------------------------------------------------------|
| CG6224    | <i>dbo</i>      | GD 22476<br>NIG 6224R-1<br>NIG 6224R-3<br>KK 105407            | wild type<br>variable hair orientation<br>variable hair orientation<br>wings disrupted | wild type <sup>‡</sup><br>wild type <sup>‡</sup><br>wild type <sup>‡</sup><br>slight accumulation of Fmi? <sup>‡</sup> |
| G6384     | <i>Cp190</i>    | GD 35077<br>GD 35078<br>NIG 6384R-1                            | wild type<br>wings disrupted<br>wild type                                              | -<br>wild type<br>-                                                                                                    |
| CG6758    | CG6758          | GD 43606                                                       | wild type                                                                              | -                                                                                                                      |
| CG6765    | CG6765          | GD 22424<br>NIG 6765R-1<br>NIG 6765R-2<br>KK 100851            | wild type<br>wild type<br>wild type<br>wings slightly disrupted                        | -<br>-<br>-<br>wild type                                                                                               |
| CG6792    | CG6792          | GD 35118<br>GD 35119<br>NIG 6792R-2<br>NIG 6792R-3             | vein defects<br>wild type<br>wild type<br>wild type                                    | wild type<br>wild type<br>-<br>-                                                                                       |
| CG7058    | CG7058          | GD 38230<br>GD 38231<br>NIG 7058R-1<br>NIG 7058R-3             | wild type<br>wild type<br>wild type<br>weak multiple wing hairs                        | -<br>-<br>-<br>-                                                                                                       |
| CG7102    | CG7102          | GD 20571<br>KK 107887                                          | wild type<br>wings disrupted                                                           | -<br>wild type                                                                                                         |
| CG7210    | <i>kel</i>      | KK 105397                                                      | wings disrupted                                                                        | slight accumulation of Fmi?                                                                                            |
| CG7230    | <i>rib</i>      | GD 15900<br>NIG 7230R-2<br>NIG 7230R-4<br>KK 103977            | wild type<br>wild type<br>wild type<br>wild type                                       | -<br>-<br>wild type<br>-                                                                                               |
| CG7837    | CG7837          | GD 22573<br>GD 23099<br>KK 109784                              | wild type<br>wild type<br>ectopic bristles                                             | -<br>-<br>-                                                                                                            |
| CG8060    | CG8060          | GD 22684<br>GD 46990<br>GD 46991<br>NIG 8060R-1<br>NIG 8069R-2 | wild type<br>wild type<br>wild type<br>wings disrupted<br>wild type                    | -<br>-<br>-<br>wild type<br>-                                                                                          |
| CG8260    | CG8260          | GD 45257                                                       | wings disrupted                                                                        | wild type                                                                                                              |
| CG8411    | <i>gcl</i>      | GD 28896<br>GD 28897<br>NIG 8411R-2<br>NIG 8411R-3             | wild type<br>wild type<br>wild type<br>wild type                                       | -<br>-<br>-<br>-                                                                                                       |
| CG8811    | <i>muskelin</i> | GD 29774<br>KK 107043                                          | wild type<br>wings disrupted                                                           | -<br>lethal                                                                                                            |
| CG8924    | CG8924          | GD 48041<br>GD 48042<br>NIG 8924R-1<br>NIG 8924R-2             | wild type<br>wild type <sup>#</sup><br>wild type<br>wild type                          | -<br>wild type<br>-<br>-                                                                                               |



| CG number | Gene symbol | RNAi line   | <i>MS1096-GAL4</i><br>adult wing | <i>ptc-GAL4</i><br>pupal wing |
|-----------|-------------|-------------|----------------------------------|-------------------------------|
| CG9097    | <i>bab1</i> | GD 6960     | lethal                           | cell packing defect           |
|           |             | GD 6961     | lethal                           | cell packing defect           |
|           |             | GD 24496    | wild type                        | -                             |
|           |             | GD 50285    | wild type                        | -                             |
|           |             | GD 50286    | wild type                        | -                             |
| CG9102    | <i>bab2</i> | GD 8943     | wild type                        | -                             |
|           |             | GD 49042    | wild type                        | wild type                     |
|           |             | GD 49043    | wild type                        | -                             |
| CG9426    | CG9426      | GD 10843    | wild type                        | -                             |
|           |             | NIG 9426R-2 | wild type                        | -                             |
| CG9467    | CG9467      | GD 45806    | ectopic bristles                 | wild type                     |
|           |             | GD 45807    | wild type                        | -                             |
| CG9970    | CG9970      | GD 45817    | wild type                        | -                             |

GD, GD collection of RNAi lines from VDRC.

KK, KK collection of RNAi lines from VDRC.

NIG, RNAi lines from NIG-FLY.

Wings disrupted: hair polarity could not be assessed as wings could not be mounted flat.

Cell packing defect: cells not organised in the normal hexagonal array.

Irregular cells: cell size and packing disturbed.

#Using *ptc-GAL4*.

\*Fmi asymmetric in hexagonal cells.

‡Strong accumulation of Fmi in combination with *kel*<sup>*IR-JF01768*</sup>. Note that the hairpins in the existing RNAi lines targeting *dbo* all overlap.

**Table S5. Summary of epistasis experiments**

|                                | <i>Ubc12</i> <sup>IR-30033</sup>        | <i>Cul-3</i> <sup>IR-109415</sup>     | <i>faf</i> <sup>IR-2956</sup>         |
|--------------------------------|-----------------------------------------|---------------------------------------|---------------------------------------|
| wt                             | Fmi Fz Stbm Pk Dsh<br>strong increase   | Fmi Fz Stbm Pk Dsh<br>strong increase | Fmi Fz Stbm Pk Dsh<br>strong decrease |
| <i>fz</i> <sup>P21</sup>       | Fmi Stbm Pk<br>slight increase          | Fmi Stbm Pk<br>wild type levels       | Fmi Stbm Pk<br>strong decrease        |
| <i>stbm</i> <sup>6</sup>       | Fmi Fz Dsh<br>slight increase           | Fmi Fz Dsh<br>slight increase         | Fmi Fz Dsh<br>strong decrease         |
| <i>pk</i> <sup>pk-sple13</sup> | Fmi Fz Stbm Dsh<br>strong increase      | Fmi Fz Stbm Dsh<br>strong increase    | Fmi Fz Stbm Dsh<br>strong decrease    |
| <i>dgo</i> <sup>380</sup>      | Fmi Fz Stbm Dsh<br>strong increase      | Fmi Fz Stbm Dsh<br>strong increase    | Fmi Fz Stbm Dsh<br>strong decrease    |
| <i>dsh</i> <sup>V26</sup>      | Fmi (wt) Stbm (wt)<br>wild type levels* | Fmi Stbm<br>wild type levels          | Fmi Stbm<br>strong decrease           |

*ptc-GAL4* was used to express RNAi against *Ubc12*, *Cul-3* or *faf* in the various mutant backgrounds, and the levels of junctional proteins were assessed relative to non-RNAi-expressing tissue within the same wing. The table shows all the core proteins that were tested for any particular genotype. If a protein is not listed, this indicates that its junctional levels were not analysed in this genotype.

\*Distal *dsh* clones within the *Ubc12* RNAi-expressing domain completely suppress the accumulation of core proteins at junctions caused by the RNAi, as the RNAi expression is less well expressed distally. Proximal *dsh* clones (in regions where the *Ubc12* RNAi is strongly expressed) do not completely suppress the accumulation phenotype. This argues that *Ubc12* has a second target that affects core protein accumulation at junctions.
